# Supplementary material
Source: MDPI journal article supplement (https://www.mdpi.com/2571-550X/5/1/9)
Supplement: s1 [file s1]

## Supplementary Material

**Table S1.** List of published paleoflood records from lake

| Lake                              | Country     | Latitude | Longitude | Reference                                                    |
|-----------------------------------|-------------|----------|-----------|--------------------------------------------------------------|
| Blanc Aiguilles Rouges            | France      | 45.98    | 6.92      | Wilhelm et al., 2013, J. of Quat. Sci. 28(2): 189–199        |
| Anterne                           | France      | 45.99    | 6.79      | Arnaud et al., 2002, Terra Nova 14, 225–232                  |
| Anterne                           | France      | 45.99    | 6.79      | Giguët-Covex et al., 2011, The Holocene 21(4), 651–665       |
| Anterne                           | France      | 45.99    | 6.79      | Giguët-Covex et al., 2012, Quat. Research 77(1): 12–22       |
| Bourget                           | France      | 45.77    | 5.84      | Chapron et al., 2005, Boreas 34(4), 404–416                  |
| Bourget                           | France      | 45.77    | 5.84      | Jenny et al., 2014, J. of Paleolimnology 51(4): 469–483      |
| Bourget                           | France      | 45.77    | 5.84      | Evin et al., 2019, Global and Planetary Change 172, 114–123  |
| Allos                             | France      | 44.23    | 6.72      | Wilhelm et al., 2012, Quat. Research 78(1): 1–12             |
| Allos                             | France      | 44.23    | 6.72      | Wilhelm et al., 2015, <i>Sedimentology</i> 62(4): 1103–1117  |
| Allos                             | France      | 44.23    | 6.72      | Brisset et al., 2017, <i>Geology</i> . doi: 10.1130/G38498.1 |
| Foréant                           | France      | 44.71    | 6.99      | Wilhelm et al., 2016, <i>Climate of the Past</i> 12, 299–316 |
| Savine                            | France      | 45.105   | 6.55      | Sabatier et al., 2017, Quat. Science Reviews                 |
| Gers                              | France      | 46.03    | 6.73      | Bajard et al., 2020, Pal., Pal., Pal. 538, 109462            |
| Ammersee                          | Germany     | 48.00    | 11.12     | Czymzik M. et al., 2010, WRR 46, W11528                      |
| Ammersee                          | Germany     | 48.00    | 11.12     | Czymzik M. et al., 2013, Quat. Sci. Rev. 61, 96–110          |
| Lehnmühle                         | Germany     | 50.83    | 13.59     | Kämpf et al., 2012, Quat. Science J. 61(1), 3–15             |
| Mondsee                           | Austria     | 47.48    | 13.23     | Swierczynski et al., 2012, <i>Geology</i> 40(11), 1047–1050  |
| Mondsee                           | Austria     | 47.48    | 13.23     | Swierczynski, et al., 2013, Quat. Sci. Rev. 80 (2013). 78–90 |
| Mondsee                           | Austria     | 47.48    | 13.23     | Schubert et al., 2020, Pal. Pal. Pal. 559                    |
| Oeschinen                         | Switzerland | 46.5     | 7.73      | Amann et al., 2015, Quat. Sci. Rev. 115, 89–100.             |
| Lauerz                            | Switzerland | 47.04    | 8.61      | Busmann et al., 2010, Swiss J Geosci. 103: 43–59             |
| Baldegg                           | Switzerland | 47.2     | 8.26      | Glur et al., 2013, Scientific Reports 3: 2770                |
| Seelisberg                        | Switzerland | 46.96    | 8.57      | Glur et al., 2013, Scientific Reports 3: 2770                |
| Hinterer Schwendisee              | Switzerland | 47.18    | 9.33      | Glur et al., 2013, Scientific Reports 3: 2770                |
| Faelen                            | Switzerland | 47.25    | 9.42      | Glur et al., 2013, Scientific Reports 3: 2770                |
| Hinterburg                        | Switzerland | 46.72    | 8.07      | Glur et al., 2013, Scientific Reports 3: 2770                |
| Trueb                             | Switzerland | 46.79    | 8.39      | Glur et al., 2015, Holocene 25, 280–287                      |
| Glattalp                          | Switzerland | 46.92    | 8.9       | Glur et al., 2013, Scientific Reports 3: 2770                |
| Grimsel                           | Switzerland | 46.57    | 8.33      | Glur et al., 2013, Scientific Reports 3: 2770                |
| Iffig                             | Switzerland | 46.39    | 7.41      | Glur et al., 2013, Scientific Reports 3: 2770                |
| Alzasca                           | Switzerland | 46.26    | 8.59      | Wirth et al., 2013, Quat. Sci. Rev. 80, 112–128.             |
| Cadagno                           | Switzerland | 46.54    | 8.71      | Wirth et al., 2013, Quat. Sci. Rev. 80, 112–128.             |
| Ledro                             | Italy       | 45.87    | 10.75     | Wirth et al., 2013, Quat. Sci. Rev. 80, 112–128.             |
| Ledro                             | Italy       | 45.87    | 10.75     | Vanniere et al., 2013, Clim. Past 9, 1193–1209.              |
| Ledro                             | Italy       | 45.87    | 10.75     | Simonneau et al., 2013, Clim. Past, 9, 825–840               |
| Garlate                           | Italy       | 45.82    | 9.41      | Wirth et al., 2013, Quat. Sci. Rev. 80, 112–128.             |
| Ghirla                            | Italy       | 45.91    | 8.82      | Wirth et al., 2013, Quat. Sci. Rev. 80, 112–128.             |
| di Braies                         | Italy       | 46.69    | 12.08     | Irmeler et al., 2006, Geomorphol 77:69–78                    |
| Maggiore                          | Italy       | 45.92    | 8.52      | Kämpf et al., 2012, Freshwater Biology 57, 2076–2090         |
| Montcortes                        | Spain       | 42.33    | 0.99      | Corella et al., 2014, Quat. Sci. Rev. 93(0):77–90.           |
| Cape Bounty Watershed Observatory | Canada      | 74.53    | -109.32   | Lapointe et al., 2012, J. Paleolimnol., 48, 159–173.         |
| Nicolay                           | Canada      | 77.53    | -95.47    | Lamoureux, 2000, J. Paleolimnol.                             |
| Suigetsu                          | Japan       | 35.58    | 135.88    | Schlögl et al., 2014, Quat. Sci. Rev. 83, 157 – 170.         |
| Silvaplana                        | Switzerland | 46.24    | 9.52      | Stewart et al., 2011, Pal., Pal., Pal. 311/3–4, 215–123      |

|                             |                     |        |         |                                                                                                                                         |
|-----------------------------|---------------------|--------|---------|-----------------------------------------------------------------------------------------------------------------------------------------|
| Russvatnet                  | Norway              | 61.54  | 8.66    | Storen et al., 2008, Holocene 18, 1179e1191.                                                                                            |
| Meringsdalsvatnet           | Norway              | 61.67  | 9.19    | Storen et al., 2010, Quat. Sci. Rev.,29, 3021–3033.                                                                                     |
| Meringsdalsvatnet           | Norway              | 61.67  | 9.19    | Storen et al., 2016, G3 17(10), 4236-4235                                                                                               |
| Butjonna                    | Norway              | 62.13  | 10.16   | Boe et al. , 2006, The Holocene 16: 445–455                                                                                             |
| Oldevatnet                  | Norway              | 61.78  | 6.82    | Vasskog et al., 2011, The Holocene 21, 597–614.                                                                                         |
| Atnsjoen                    | Norway              | 61.88  | 10.14   | Nesje et al., 2001, J. of Paleolimnology 25: 329–342.                                                                                   |
| Fryasletta                  | Norway              | 61.55  | 10.01   | Nesje et al., 2016, In: Ingar M. Gundersen (ed.), Gård og utmark i Gudbrandsdalen - Arkeologiske undersøkelser i Fron 2011-2012, Norway |
| TT Lake                     | China               | 31.1   | 86.57   | Ahlborn et al., 2015, The Holocene 25, 508–522                                                                                          |
| Taravilla                   | Spain               | 40.39  | 1.59    | Moreno et al., 2008, J. of Paleolimnology 40, 943–961.                                                                                  |
| PAD 54 ('Horseshoe Slough') | Canada              | 58.52  | -111.34 | Wolfe et al., 2006,Canada. Hydro. Proc. 20: 4131-4153.                                                                                  |
| PAD 15 ('Pete's Creek')     | Canada              | 58.57  | -111.29 | Wolfe et al., 2008, GRL 35, L24402                                                                                                      |
| El Tobar                    | Spain               | 40.53  | -3.93   | Barreiro-Lostres et al., 2017, Catena 149, 782–798                                                                                      |
| El Tejo                     | Spain               | 39     | -1.87   | Barreiro-Lostres et al., 2017, Catena 149, 782–798                                                                                      |
| La Parra                    | Spain               | 39.98  | -1.87   | Barreiro-Lostres et al., 2017, Catena 149, 782–798                                                                                      |
| Amherst Lake                | USA                 | 43.49  | -72.7   | Noren et al., 2002, Nature 419, 821-824                                                                                                 |
| Beebe Pond                  | USA                 | 43.74  | -73.18  | Noren et al., 2002, Nature 419, 821-824                                                                                                 |
| Chapel Pond                 | USA                 | 44.14  | -73.75  | Noren et al., 2002, Nature 419, 821-824                                                                                                 |
| Duck Pond                   | USA                 | 44.71  | -72.07  | Noren et al., 2002, Nature 419, 821-824                                                                                                 |
| Echo Lake                   | USA                 | 43.47  | -72.7   | Noren et al., 2002, Nature 419, 821-824                                                                                                 |
| Emerald Pond                | USA                 | 43.27  | -73.01  | Noren et al., 2002, Nature 419, 821-824                                                                                                 |
| Dunmore                     | USA                 | 43.91  | -73.07  | Noren et al., 2002, Nature 419, 821-824                                                                                                 |
| Elligo                      | USA                 | 44.59  | -72.36  | Noren et al., 2002, Nature 419, 821-824                                                                                                 |
| Morey                       | USA                 | 43.92  | -72.16  | Noren et al., 2002, Nature 419, 821-824                                                                                                 |
| Richmond Pond               | USA                 | 44.42  | -72.95  | Gran et al., 1999, J. of Geoscience Education 4 7 , 420-447                                                                             |
| Ritterbush Pond             | USA                 | 44.75  | -72.6   | Brown et al., 2000, Geology 28, 335-338                                                                                                 |
| Thirteenth Lake             | USA                 | 43.71  | -74.13  | Noren et al., 2002, Nature 419, 821-824                                                                                                 |
| Vail Pond                   | USA                 | 44.71  | -72.07  | Noren et al., 2002, Nature 419, 821-824                                                                                                 |
| Crystal                     | USA                 | 43.91  | -71.08  | Parris et al., 2010, J. of Paleolimnology 43, 1, 29-49                                                                                  |
| Ogontz                      | USA                 | 44.27  | -71.91  | Parris et al., 2010, J. of Paleolimnology 43, 1, 29-49                                                                                  |
| Sandy Pond                  | USA                 | 42.78  | -72.28  | Parris et al., 2010, J. of Paleolimnology 43, 1, 29-49                                                                                  |
| South Pond                  | USA                 | 44.6   | -71.36  | Parris et al., 2010, J. of Paleolimnology 43, 1, 29-49                                                                                  |
| Stinson                     | USA                 | 43.87  | -71.8   | Parris et al., 2010, J. of Paleolimnology 43, 1, 29-49                                                                                  |
| Worthley Pond               | USA                 | 44.46  | -70.4   | Parris et al., 2010, J. of Paleolimnology 43, 1, 29-49                                                                                  |
| Iseo                        | Italy               | 45.72  | 10.1    | Lauterbach et al., 2012, The Holocene 22, 749–760                                                                                       |
| Iseo                        | Italy               | 45.72  | 10.1    | Rapuc et al., 2019, Global and Planetary Change 175, 160-172                                                                            |
| Dead Sea                    | Israel              | 31.47  | 35.39   | Neugebauer et al., 2015, The Holocene, 25, 1358-1371                                                                                    |
| Kizaki                      | Japan               | 36.55  | 137.84  | Ito et al., 2010, Environmental Earth Sciences 60, 1607-1618                                                                            |
| Tahoe                       | USA                 | 39.09  | -120.03 | Oslegger et al., 2009, J. of Paleolimnology 42:103–122                                                                                  |
| Tutira                      | New-Zealand         | -39.22 | 176.89  | Page et al., 2010, Marine Geology 270 : 30–44                                                                                           |
| Waikopiro                   | New-Zealand         | -39.23 | 176.89  | Page et al., 2010, Marine Geology 270 : 30–44                                                                                           |
| Nakaumi                     | Japan               | 35.46  | 133.19  | Ota et al., 2017, J. Quat. Sci. DOI: 10.1002/jqs.2982                                                                                   |
| Potrok Aike                 | Argentina Patagonia | -51.59 | -70.21  | Jouve et al., 2017, Pal. Pal. Pal. 472, 33-50                                                                                           |
| Brotherswater               | UK                  | 54,51  | -2.92   | Schillereff et al., 2019, Global and Planetary Change 182, 102998                                                                       |
| Muzelle                     | France              | 44,94  | 6,09    | Fouinat et al., 2017, Quat. Research 87, 407-22                                                                                         |
| Bassenthwaite               | UK                  | 54,3   | 3,11    | Chiverell et al., 2019, Earth Surface Proc. Landforms 44, 2366-2376                                                                     |

|                 |             |       |         |                                                                 |
|-----------------|-------------|-------|---------|-----------------------------------------------------------------|
| Thun            | Switzerland | 46,69 | 7,71    | Wirth et al., 2011, Sedimentology 58, 1737-1761.                |
| Sandvinvatnet   | Norway      | 60,04 | 6,54    | Ekblom et al., 2020, Frontiers in Earth science 8, 239          |
| Flyginnssjøen   | Norway      | 60,14 | 12,07   | Engeland et al., 2020, Hydro. and Earth Sys. Sci. 24, 5595-5619 |
| Storsjön        | Sweden      | 63,25 | 14,31   | Labuhn et al., 2018, Quat. 1(1), 2                              |
| Buarvatnet      | Norway      | 59,23 | 5,4     | Rothe et al., 2019, Boréas 48(3), 616-634                       |
| Quinault        | USA         | 47,48 | -123,87 | Smith et al., 2019, The Holocene 29(8), 1273-1291               |
| Pianico-Sellere | Italy       | 45,81 | 10,04   | Witt et al., 2017, Hydrol. Earth Syst. Sci., 21, 5547–5581      |
| Kanas           | China       | 48,8  | 87,03   | Zhou et al., 2018, Chinese Geographical sciences 28, 773–783    |
| Svartvatnet     | Norway      | 67.98 | 13.14   | Røthe et al., 2019, The Holocene 2019, 29(8)                    |
